# Supplementary material for: Effects of Combinations of Untranslated-Region Sequences on Translation of mRNA
Source: MDPI journal article supplement (doi:10.3390/biom13111677), 2023-11-20
Supplement: s1 [file s1]

**Supplement Table S1: 5'UTR and 3'UTR sequences**

| Name                    | UTR   | Sequence                                                                                                                                                                                                                                                                                                                                                                                     |
|-------------------------|-------|----------------------------------------------------------------------------------------------------------------------------------------------------------------------------------------------------------------------------------------------------------------------------------------------------------------------------------------------------------------------------------------------|
| H4C2                    | 5'UTR | GGGAAATAGTACCTGGTTTTTGTGTGTCAGCTGGTTAGCCACC                                                                                                                                                                                                                                                                                                                                                  |
| HBB                     | 5'UTR | GGGAAATACATTTGCTTCTGACACAACCTGTGTTCACTAGCAACCTCAA<br>ACAGCCACC                                                                                                                                                                                                                                                                                                                               |
| Rabb                    | 5'UTR | GGGAAATACACTTGCTTTGACACAACCTGTGTTTACTTGCAATCCCCCA<br>AAACAGACAGACGCCACC                                                                                                                                                                                                                                                                                                                      |
| TPL                     | 5'UTR | GGGAAATACTCTCTTCGCATCGCTGTCTGCGAGGGCCAGCTGTTGGGC<br>TCGCGGTTGAGGACAAACTCTTCGCGGTCTTTCCAGTACTCTTGGATC<br>GGAAACCCGTCGGCCTCCGAACGGTACTCCGCCACCGAGGGACCTGA<br>GCGAGTCCGCATCGACCGGATCGGAAAACCTCTCGAGAAAGGCGTCT<br>AACCAGTCACAGTCGCAAGAAGCTTAGCATTCGGGTAACCTGTTGGTAA<br>AGCCACC                                                                                                                   |
| RNA-1273<br>(Moderna)   | 5'UTR | GGGAAATAAGAGAGAAAAGAAGAGTAAGAAGAAATATAAGACCCCG<br>GCGCCGCCACC                                                                                                                                                                                                                                                                                                                                |
| BNT162b2<br>(Bionthech) | 5'UTR | GAGAATAAACTTGTATTCTTCTGGTCCCCACAGACTCAGAGAGAACCC<br>GCCACC                                                                                                                                                                                                                                                                                                                                   |
| mtRNR-<br>EMCV          | 3'UTR | CAAGCACGCAGCAATGCAGCTCAAAACGCTTAGCCTAGCCACACCCC<br>CACGGGAAACAGCAGTGATTAACCTTTGCAATAAACGAAAGTTTAAC<br>TAAGCTATACTAACCCCAGGGTTGGTCAATTTTCGTGCCAGCCACACCC<br>TGGAGCTAGCGGGGCTGAAGGATGCCAGAAGGTACCCCATTTGTATG<br>GGATCTGATCTGGGGCCTCGGTGCACATGCTTTACATGTGTTTAGTCG<br>AGGTTAAAAAGCGTCTAGGCCCCCCGAACCACGGGGACGTGGTTTTCC<br>TTTGAAAAACACGATGATAATATGGCCACAACCGGCTTCTGCCTAATA<br>AAGAATGTTTCAGCTCAA |
| mtRNR-<br>mtRNR         | 3'UTR | CAAGCACGCAGCAATGCAGCTCAAAACGCTTAGCCTAGCCACACCCC<br>CACGGGAAACAGCAGTGATTAACCTTTGCAATAAACGAAAGTTTAAC<br>TAAGCTATACTAACCCCAGGGTTGGTCAATTTTCGTGCCAGCCACACCC<br>TGGAGCTAGCCAAGCACGCAGCAATGCAGCTCAAAACGCTTAGCCTA<br>GCCACACCCCCACGGGAAACAGCAGTGATTAACCTTTGCAATAAACG<br>AAAGTTTAACTAAGCTATACTAACCCCAGGGTTGGTCAATTTTCGTGCC<br>AGCCACACCCTGGAGCTAGC                                                   |
| mtRNR-<br>AES           | 3'UTR | CAAGCACGCAGCAATGCAGCTCAAAACGCTTAGCCTAGCCACACCCC<br>CACGGGAAACAGCAGTGATTAACCTTTGCAATAAACGAAAGTTTAAC<br>TAAGCTATACTAACCCCAGGGTTGGTCAATTTTCGTGCCAGCCACACCC<br>TGGAGCTAGCCTCGAGCTGGTACTGCATGCACGCAATGCTAGCTGCCC<br>CTTTCCCGTCTGGGTACCCCGAGTCTCCCCCGACCTCGGGTCCCAGG<br>TATGCTCCCACCTCCACCTGCCCCACTCACCACTCTGCTAGTTCCAGAC<br>CACCTCC                                                               |
| RNA-1273<br>(Moderna)   | 3'UTR | GCTGGAGCCTCGGTGGCCTAGCTTCTTGCCCCTTGGGCCTCCCCCAG<br>CCCCTCCTCCCCTTCTGCACCGTACCCCGTGTCTTTGAATAAAGTCT<br>GAGTGGGCGGCA                                                                                                                                                                                                                                                                           |
| BNT162b2<br>(Bionthech) | 3'UTR | CTCGAGCTGGTACTGCATGCACGCAATGCTAGCTGCCCCTTTCCCGTC<br>CTGGGTACCCCGAGTCTCCCCGACCTCGGGTCCCAGGTATGCTCCCA<br>CCTCCACCTGCCCCACTCACCACTCTGCTAGTTCCAGACACCTCCCA<br>AGCACGCAGCAATGCAGCTCAAAACGCTTAGCCTAGCCACACCCCCA<br>CGGGAAACAGCAGTGATTAACCTTTGCAATAAACGAAAGTTTAAC<br>AGCTATACTAACCCCAGGGTTGGTCAATTTTCGTGCCAGCCACACCTG<br>GAGCTAGC                                                                   |
